# Supplementary material for: Sub-nanometer scale size-control of iron oxide nanoparticles with drying time of iron oleate
Source: Royal Society of Chemistry journal article supplement (doi:10.1039/c9ce00112c), 2019-01-01
Supplement: c9ce00112c1.pdf [file c9ce00112c1.pdf]

## Supporting information

### Sub-nanometer scale size-control of iron oxide nanoparticles with drying time of iron oleate

Thiruparasakthi Balakrishnan, Min-Jae Lee, Jahar Dey and Sung-Min Choi\*

*Department of Nuclear and Quantum Engineering, Korea Advanced Institute of Science and  
Technology, Daejeon, 34141, Republic of Korea.*

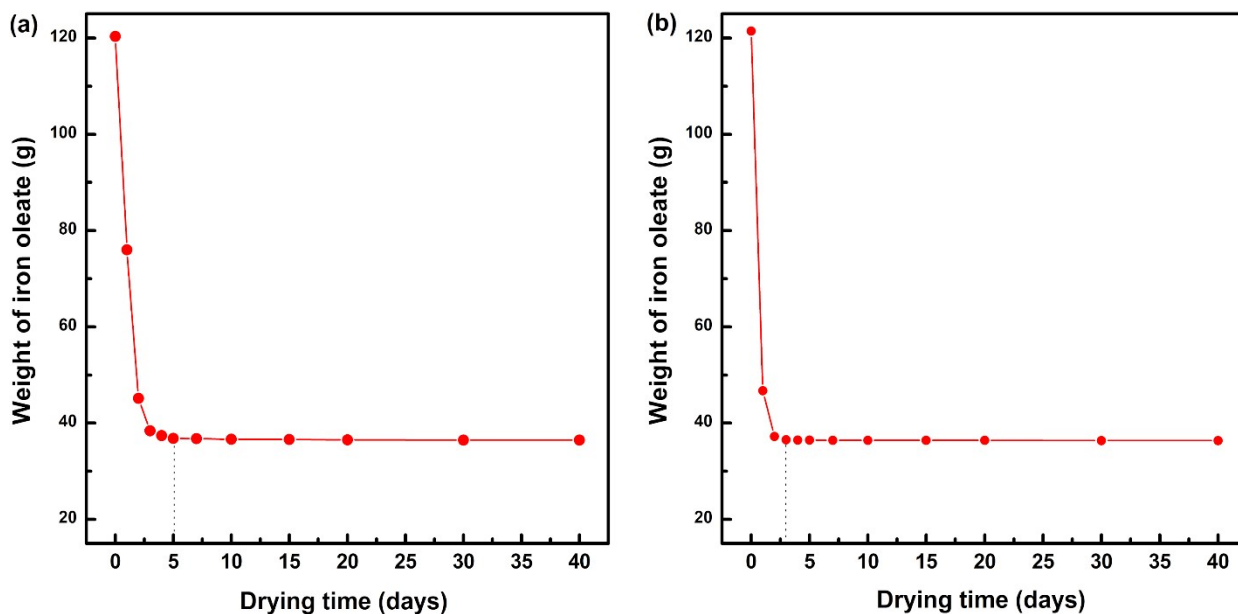

**Figure S1.** Weight of as-prepared iron oleate depending on the drying time. The as-prepared iron oleate is dried at (a) 30 °C and (b) 60 °C for a different amount of time.

**Table S1:** Elemental analysis (in wt %) of the iron oleate dried for a different amount of time.

(\* indicates that the wt % is calculated by difference)

| Sample                                                                                      | C     | H     | Fe   | O*    |
|---------------------------------------------------------------------------------------------|-------|-------|------|-------|
| Iron oleate dried for 5 days                                                                | 70.35 | 11.16 | 5.56 | 12.93 |
| Iron oleate dried for 30 days                                                               | 70.53 | 11.05 | 5.75 | 12.67 |
| $\text{Fe}_3\text{O}(\text{oleate})_6 \cdot 4(\text{oleic acid}) \cdot 4\text{H}_2\text{O}$ | 70.37 | 11.14 | 5.45 | 13.04 |
| $\text{Fe}_3\text{O}(\text{oleate})_7 \cdot 3(\text{oleic acid}) \cdot 3\text{H}_2\text{O}$ | 70.78 | 11.10 | 5.49 | 12.63 |

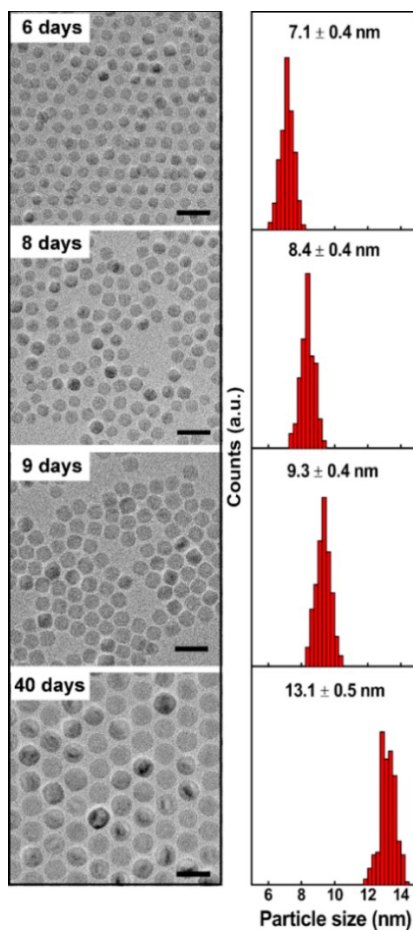

**Figure S2.** TEM images and size distributions of IONPs synthesized at 320 °C using the iron oleate dried at 30 °C for a different amount of time. All scale bars are 20 nm.

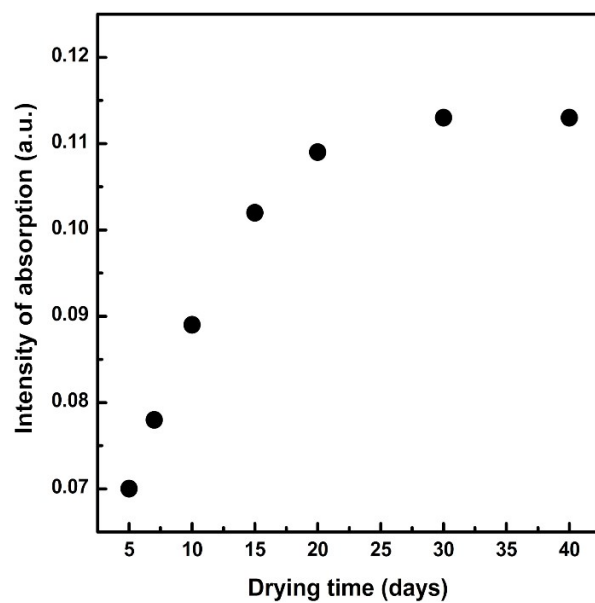

**Figure S3.** Asymmetric absorption peak intensity corresponding to bidentate ligands depending on the drying time of iron oleate at 30 °C.

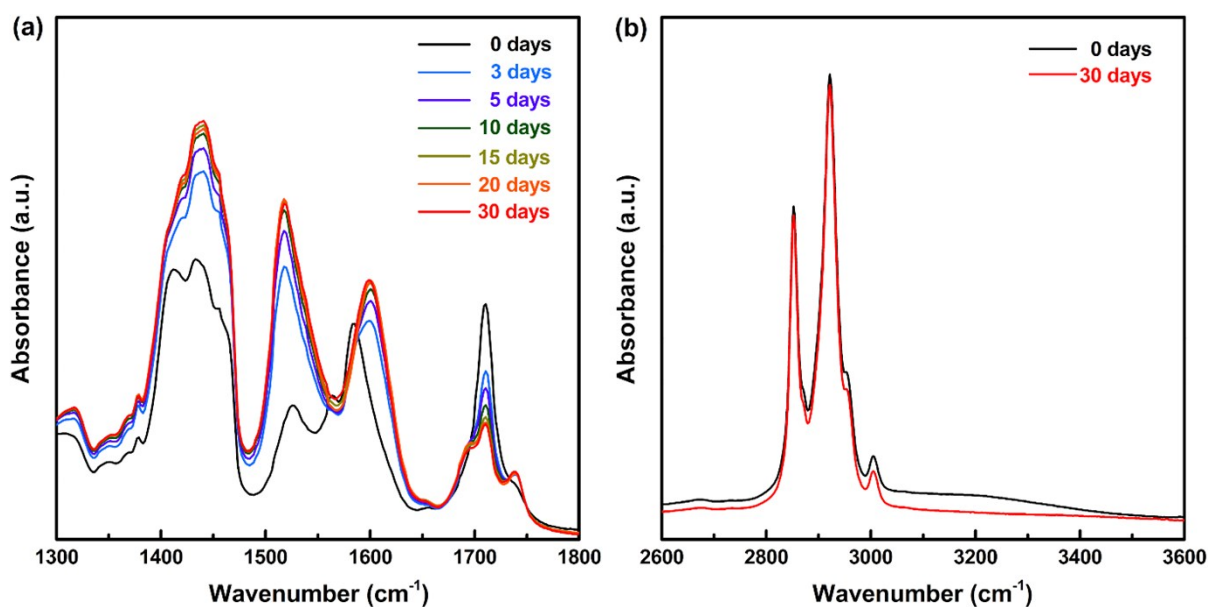

**Figure S4.** FTIR spectra of the iron oleate dried at 60 °C for a different amount of time. (a) Symmetric and asymmetric carboxylate ( $\text{COO}^-$ ), and carbonyl ( $\text{C}=\text{O}$ ) vibrations, and (b) hydrocarbon ( $\text{C-H}$ ) and hydroxyl ( $\text{OH}$ ) vibrations.

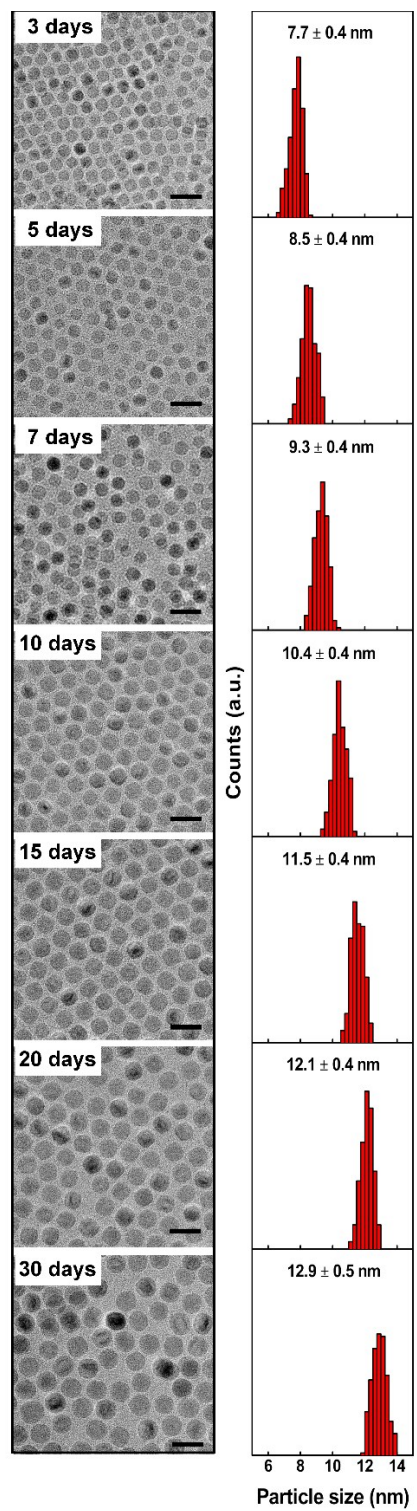

**Figure S5.** TEM images and size distributions of IONPs prepared at 320 °C using the iron oleate dried at 60 °C for a different amount of time. All scale bars are 20 nm.

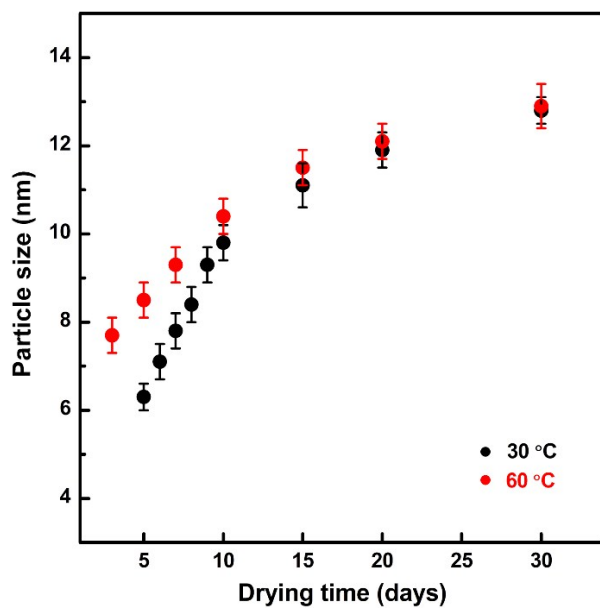

**Figure S6.** Size of IONPs depending on the drying time of iron oleate. The synthesis is performed at 320 °C using the iron oleate dried at 30 °C and 60 °C for a different amount of time.
